# Supplementary material for: The Use of an Ultrasonic Field in Support of Classical Methods of Oxidising Component Leached from Microplastics in Bottom Sediments
Source: MDPI journal article supplement (doi:10.3390/ma14113029), 2021-06-02
Supplement: s1 [file s1]

# The Use of an Ultrasonic Field in Support of Classical Methods of Oxidising Component Leached from Microplastics in Bottom Sediments

Małgorzata Kida<sup>1</sup>, Sabina Ziembowicz, Piotr Koszelnik

**Table S1. World production and consumption of DEHP**

| Location       | Year      | Production/use<br>thousand tons/year | Literature                                      |
|----------------|-----------|--------------------------------------|-------------------------------------------------|
| EU             | –         | 500                                  | Magdouli et al., 2013                           |
| Western Europe | 1997      | 595                                  | Roslev et al., 2007                             |
|                | 1999      | 476                                  |                                                 |
|                | 2004      | 221                                  |                                                 |
| Canada         | 1991      | 10                                   | Minister of Supply and<br>Services Canada, 1994 |
| Japan          | –         | 204                                  | Magnusalnervik et al.,<br>1997                  |
| Germany        | –         | 144                                  | Magnusalnervik et al.,<br>1997                  |
| USA            | 2006      | 45-230                               | Tecnon Orbichem, 2007                           |
| China          | 2006–2007 | 305-340                              | Tecnon Orbichem, 2007                           |

**Table S2. Physicochemical properties of DEHP [Peijnenburg and Struijs, 2006; Net et al., 2015]**

| Physicochemical properties                                | Unit                   | DEHP                                           | Structural formula                                                                   |
|-----------------------------------------------------------|------------------------|------------------------------------------------|--------------------------------------------------------------------------------------|
| <i>Chemical formula</i>                                   |                        | C <sub>24</sub> H <sub>38</sub> O <sub>4</sub> | 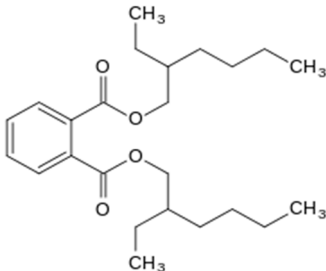 |
| <i>Molecular weight</i>                                   | g/mol                  | 390.54                                         |                                                                                      |
| <i>Vapor pressure at 200°C</i>                            | hPa                    | 1.6                                            |                                                                                      |
| <i>Vapor pressure at temperature<br/>20°C</i>             | Pa                     | 3.4·10 <sup>-5</sup>                           |                                                                                      |
| <i>Water solubility</i>                                   | mg/dm <sup>3</sup>     | 2.49·10 <sup>-3</sup>                          |                                                                                      |
| <i>Color</i>                                              |                        | colorless                                      |                                                                                      |
| <i>Physical state at temperature<br/>20°C</i>             |                        | oily liquid                                    |                                                                                      |
| <i>Log K<sub>OW</sub></i>                                 |                        | 7.73                                           |                                                                                      |
| <i>Log K<sub>OA</sub></i>                                 |                        | 10.53                                          |                                                                                      |
| <i>Log K<sub>AW</sub></i>                                 |                        | -2.8                                           |                                                                                      |
| <i>K<sub>OC</sub></i>                                     | dm <sup>3</sup> /kg    | 87 420–51·10 <sup>4</sup>                      |                                                                                      |
| <i>pK<sub>a</sub> (strongly alkaline<br/>environment)</i> |                        | -6.7                                           |                                                                                      |
| <i>H</i>                                                  | Pa·m <sup>3</sup> /mol | 4.43                                           |                                                                                      |
| <i>Density</i>                                            | g/cm <sup>3</sup>      | 0.98                                           |                                                                                      |
| <i>Boiling point</i>                                      | °C                     | 385                                            |                                                                                      |
| <i>Melting temperature</i>                                | °C                     | -55                                            |                                                                                      |
| <i>Flash-point</i>                                        | °C                     | 193                                            |                                                                                      |
| <i>Temperature of self-ignition</i>                       | °C                     | 400                                            |                                                                                      |

K<sub>OA</sub>–octanol-air partition, K<sub>OW</sub>–octanol–water partitioning, K<sub>AW</sub>–air–water partitioning, K<sub>OC</sub>–organic carbon partitioning, pK<sub>a</sub>–dissociation constant, H–Henry’s constant.

<sup>1</sup> Corresponding author. Email: mkida@prz.edu.pl

Table S3. Occurrence of di(2-ethylhexyl) phthalate in various environmental components

| Matrix                   | Type          | Location         | DEHP [ng/dm <sup>3</sup> ] |            |                |               | Literature                |
|--------------------------|---------------|------------------|----------------------------|------------|----------------|---------------|---------------------------|
|                          |               |                  | <i>min</i>                 | <i>max</i> | <i>average</i> | <i>median</i> |                           |
| <i>Drinking water</i>    | tap water     | Spain            | -                          | -          | 445            | -             | Blanchard et al., 2013    |
|                          |               | China            | -                          | -          | 12, 487        | -             | Tang et al., 2012         |
|                          |               | France           | -                          | -          | 350            | -             | Blanchard et al., 2013    |
|                          | bottled water | Spain            | ND                         | 1520       | -              | -             | Guart et al., 2014        |
|                          |               | Hungary          | 16                         | 1700       | -              | -             | Keresztes et al., 2013    |
|                          |               | Canada           | 360                        | 460        | -              | -             | Cao et al., 2008          |
| <i>Underground water</i> |               | Egypt            | ND                         | 298        | 104            | 67            | Zaki et al., 2004         |
|                          |               | Spain            | -                          | 5661       | -              | -             | López-Roldán et al., 2004 |
| <i>Rain</i>              |               | Netherlands      | 0.69                       | 1.7        | -              | -             | Vethaak et al., 2005      |
| <i>Air</i>               |               | Shanghai, China  | 0.150                      | 0.368      | -              | -             | Wang et al., 2006         |
|                          |               | Zhejiang, China  | 0.097                      | 0.301      | -              | -             | Wang et al., 2006         |
|                          |               | Guangdong, China | 0.112                      | 0.250      | -              | -             | Wang et al., 2006         |

ND – no data

Table S4. Occurrence of di(2-ethylhexyl) phthalate in surface water

| Type         | Location                   | DEHP [µg/dm <sup>3</sup> ] |            |                |               | Literature             |
|--------------|----------------------------|----------------------------|------------|----------------|---------------|------------------------|
|              |                            | <i>min</i>                 | <i>max</i> | <i>average</i> | <i>median</i> |                        |
| <b>River</b> | Veldwachters, South Africa | 80                         | 431        | -              | -             | Olujimi et al., 2012   |
|              | Klang, Malaysia            | 3.1                        | 64.3       | -              | -             | Tan, 1995              |
|              | Yangtze River, China       | 12.07                      | 2127       | -              | -             | Zhang et al., 2018     |
|              | Rhône, France              | 0.04                       | 0.407      | -              | -             | Paluselli et al., 2017 |
|              | Somme, France              | 5.16                       | 20.76      | 10.23          | 8.88          | Net et al., 2014       |
|              | Jiulong, China             | 0.62                       | 12.43      | -              | -             | Li et al., 2017        |
|              | Yangtze River, China       | 0.01                       | 54.7       | -              | -             | Wang et al., 2008a     |
|              | Dam, Japan                 | ND                         | 3.60       | -              | -             | Suzuki et al., 2001    |

|             |                                                  |       |       |       |      |                            |
|-------------|--------------------------------------------------|-------|-------|-------|------|----------------------------|
|             | Dommel, the Netherlands                          | 0.9   | 5     | -     | 3.2  | Vethaak et al., 2005       |
|             | Kaweri, India                                    | ND    | 0.822 | -     | -    | Selvaraj et al., 2015      |
|             | Ebro, Muga, Fluvia, Ter, Besos, Llobregat, Spain | 0.12  | 4.98  | 1.19  | -    | Sanchez-Avila et al., 2012 |
|             | Ebro, Spain                                      | 0.136 | 32.86 | 2.28  | -    | Catalan Water Agency, 2011 |
|             | Wangyang, China                                  | 0.26  | 0.94  | 0.48  | 0.43 | Zhang et al., 2015         |
|             | Rivers of the Eastern Cape, South Africa         | 0.06  | 2306  | -     | -    | Fatoki and Noma, 2002      |
|             | Rhine, Germany                                   | 25    | 36    | -     | -    | Fromme et al., 2002        |
|             | Supraśl, Polska                                  | -     | 8.67  | 1.04  | -    | GIOŚ, 2016                 |
|             | Horodnianska, Poland                             | -     | 1.63  | 0.81  | -    | GIOŚ, 2016                 |
|             |                                                  | -     | -     | 1.78  | -    | GIOŚ, 2016                 |
|             | Czarna, Poland                                   | -     | 0.66  | 0.24  | -    | GIOŚ, 2016                 |
|             | Liza, Poland                                     | -     | 0.98  | 0.23  | -    | GIOŚ, 2016                 |
|             | Mała Panew, Poland                               | -     | 0.40  | -     | -    | GIOŚ, 2016                 |
|             | Łukawica, Poland                                 | -     | -     | 0.3   | -    | GIOŚ, 2016                 |
|             | Biała, Poland                                    | -     | -     | 3.22  | -    | GIOŚ, 2016                 |
| <b>Lake</b> | 15 lakes in the city of Guangzhou, China         | 0.237 | 1.60  | -     | -    | Zeng et al., 2008a         |
|             | Tuczno, Poland                                   | -     | -     | 0.29  | -    | GIOŚ, 2013                 |
|             |                                                  | -     | -     | 0.65  | -    | GIOŚ, 2014                 |
|             | Kłeckie, Poland                                  | -     | -     | 0.65  | -    | GIOŚ, 2014                 |
|             | Skąpe, Poland                                    | -     | -     | 0.405 | -    | GIOŚ, 2014                 |

ND – no data

**Table S5. Occurrence of di(2-ethylhexyl) phthalate in bottom sediments**

| Type         | Location                               | DEHP [mg/kg d.w.] |            |                |               | Literature           |
|--------------|----------------------------------------|-------------------|------------|----------------|---------------|----------------------|
|              |                                        | <i>min</i>        | <i>max</i> | <i>average</i> | <i>median</i> |                      |
| <b>River</b> | Meuse, Rhine, Scheldt, the Netherlands | 0.123             | 7.6        | 0.6            | -             | Vethaak et al., 2005 |
|              | Wangyang, China                        | 0.161             | 0.465      | 0.307          | 0.304         | Zhang et al., 2015   |
|              | Yellow River, China                    | 6.35              | 259        | -              | 45.7          | Sha et al., 2007     |
|              | Klang, Malaysia                        | 0.49              | 15.0       | -              | 1.63          | Tan, 1995            |
|              | Houjing, Taiwan                        | 0.10              | 20.22      | 7.0            | -             | Lin et al., 2009     |
|              | Yangtze River, China                   | 13.9              | 322        | -              | 144           | Wang et al., 2008b   |
|              | Pearl River, China                     | 0.415             | 29.5       | -              | 1.46          | Liu et al., 2014     |
|              | Ogun, Nigeria                          | 0.02              | 0.82       | 0.172          | 0.05          | Adeniyi et al., 2011 |
|              | Trent, UK                              | 0.84              | 31.0       | -              | -             | Long et al., 1998    |
|              | Aire, UK                               | 7.89              | 115.2      | 26.63          | -             | Long et al., 1998    |

|             |                              |       |      |       |      |                    |
|-------------|------------------------------|-------|------|-------|------|--------------------|
| <b>Lake</b> | Love, Salt,<br>Canon, Taiwan | 0.40  | 34.8 | 5.02  | -    | Chen et al., 2013  |
|             | Jiulong, China               | 0.053 | 1.28 | 0.35  | 0.19 | Li et al., 2017    |
|             | Odra, Poland                 | -     | -    | 1.19  | -    | GIOŚ, 2016         |
|             | Paręta, Poland               | -     | -    | 1.94  | -    | GIOŚ, 2016         |
|             | Wu, China                    | -     | -    | 202.3 | -    | Wang et al., 2008b |
|             | East, China                  | -     | -    | 323.5 | -    | Wang et al., 2008b |
|             | Wielkie Dąbie,<br>Poland     | -     | -    | 4.17  | -    | GIOŚ, 2016         |
|             |                              |       |      | <0.1  |      | GIOŚ, 2013         |
|             | Lubinieckie,<br>Poland       | -     | -    | 1.20  | -    | GIOŚ, 2015         |
|             |                              |       |      |       |      |                    |

GIOŚ - Chief Inspectorate for Environmental Protection in Poland

**Table S6. Occurrence of di (2-ethylhexyl) phthalate in soil**

| <b>Type</b>                  | <b>Location</b>                       | <b>DEHP [mg/kg d.w.]</b> |            |                |               | <b>Literature</b>             |
|------------------------------|---------------------------------------|--------------------------|------------|----------------|---------------|-------------------------------|
|                              |                                       | <i>min</i>               | <i>max</i> | <i>average</i> | <i>median</i> |                               |
| <b>Area<br/>agricultural</b> | Guangzhou,<br>China                   | 0.180                    | 29.37      | 4.09           | 0.308         | Zeng et al., 2008b            |
|                              | Spain                                 | 1                        | 63         | -              | -             | Plaza-Bolanos et al.,<br>2012 |
|                              | Shijiazhuang,<br>China                | 0.066                    | 0.263      | 0.143          | 0.132         | Zhang et al., 2015            |
|                              | Nanjing, China                        | 0.240                    | 4.18       | 0.184          | 0.194         | Wang et al., 2015             |
|                              | Yangtze River<br>Delta, China         | ND                       | 9.19       | 0.546          | 0.349         | Sun et al.,<br>2013           |
|                              | Amursko-<br>Sungarian Plain,<br>China | 0.077                    | 0.583      | 0.222          | 0.203         | Wang et al., 2017             |
|                              | Xinjiang, China                       | 104                      | 149        | 128.7          | -             | Guo and Wu, 2011              |
|                              | France                                | -                        | -          | 0.242          | -             | Tran et al., 2015             |
|                              | Czech Republic                        | 0.16                     | 1.02       | -              | -             | Dankova et al., 2012          |
|                              | Roskilde,<br>Denmark                  | 0.012                    | 1.9        | -              | -             | Vikelsøe et al., 2002         |
| <b>Urban area</b>            | UK                                    | 0.022                    | 0.075      | -              | -             | Gibson et al., 2005           |
|                              | China                                 | ND                       | 6.22       | 0.821          | 0.562         | Niu et al., 2014              |
|                              | Guangzhou,<br>China                   | 1.41                     | 264        | 63             | 31.9          | Zeng et al., 2009             |
|                              | Tianjin, China                        | 0.028                    | 4.17       | 0.618          | 0.099         | Kong et al., 2012             |
|                              | Scotland, Great<br>Britain            | 0.025                    | 1.596      | 0.162          | 0.110         | Rhind et al., 2013            |
| <b>Recreation<br/>area</b>   | Novi Sad, Serbia                      | 0.164                    | 2.04       | 0.844          | -             | Škrbić et al., 2016           |
|                              | Tianjin, China                        | 0.043                    | 0.801      | 0.179          | 0.125         | Zhao et al., 2018             |
|                              | Guangzhou,<br>China                   | 0.892                    | 154        | 29.4           | 10.4          | Zeng et al., 2009             |

ND–no data

Cavitation bubbles appear as a result of local disruption of the medium under the influence of high tensile forces. During the operation of the ultrasonic field, cavitation bubbles increase their radius twice or more. Subsequently, they collapse rapidly, resulting in the release of a large amount of energy, resulting in a local increase in temperature and pressure. A sharp increase in pressure inside the bubble causes them to crack and the formation of a hydrodynamic shock wave. Extreme conditions are the reason for the thermal breakdown of water molecules, during which hydroxyl radicals are formed, which are the main source of so-called sonochemical reactions (reactions 1–13). This phenomenon significantly accelerates the course of chemical and physical reactions [Miłowska, 2007; Bogacki and Naumczyk, 2009].

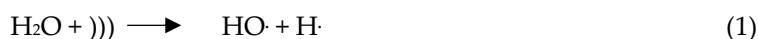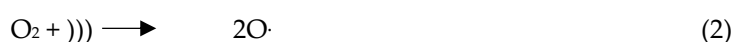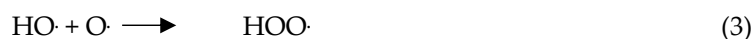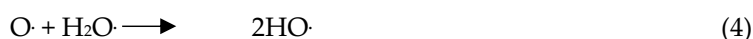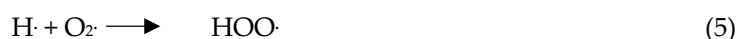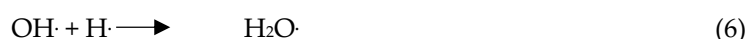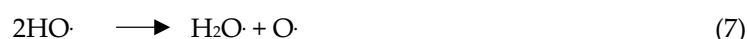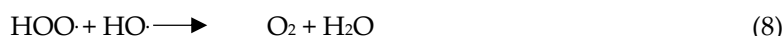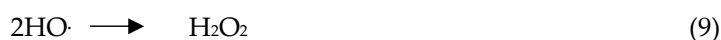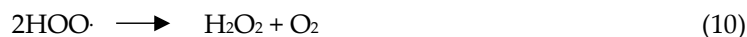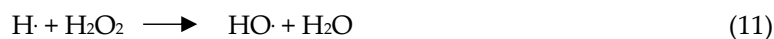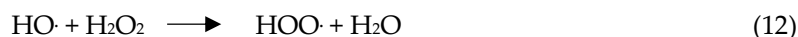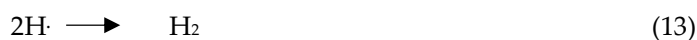

Fenton's reaction is a complex process that involves many side reactions. In soil, bottom sediments, these reactions include basic radical initiation (reactions (14) and (15)), propagation (reactions (16) and (17)) and termination (reactions (18)–(20)), as well as reactions with intermediates (reactions (21)–(28)), with carbonate and bicarbonate ions (reactions (29)–(34)) and with natural organic matter (NOM) (reactions (35)) [Yap et al., 2011 ; Gan and Ng, 2012; Cheng et al., 2016].

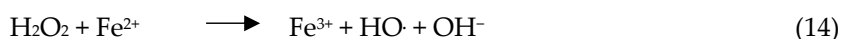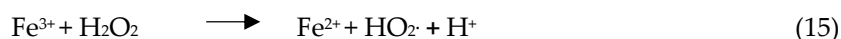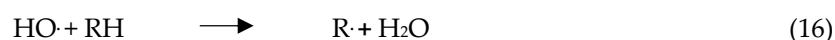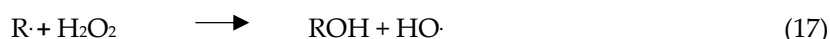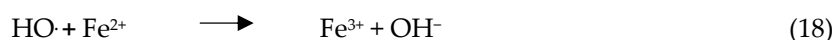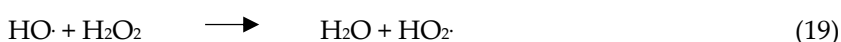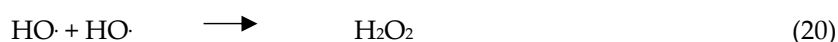

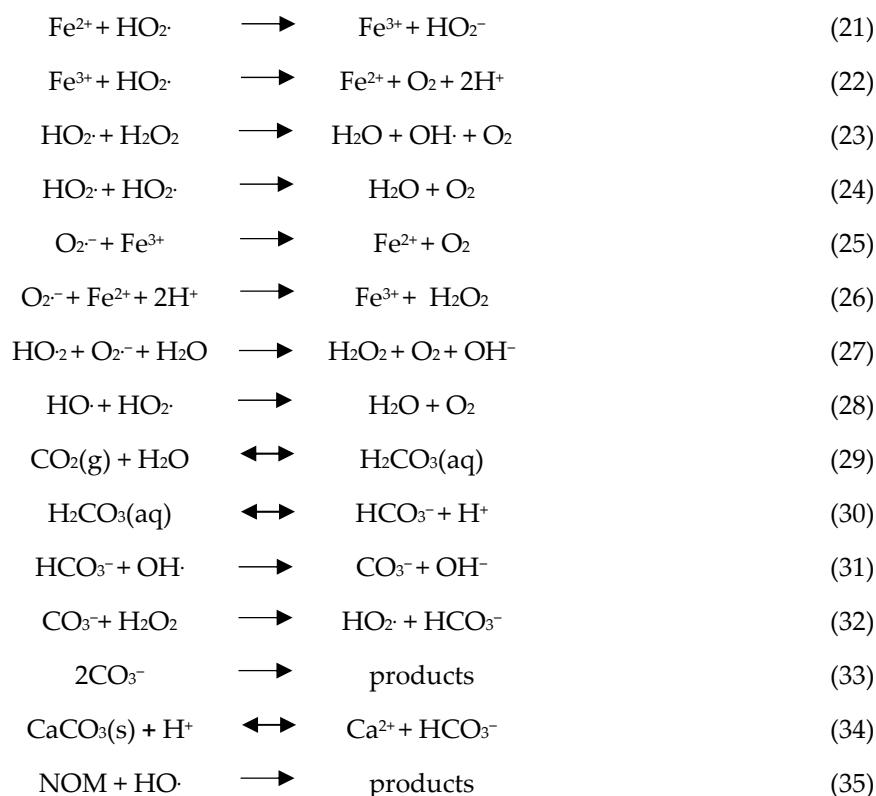

## References

1. Adeniyi A. A., Okedeyi O. O., Yusuf K. A. Flame ionization gas chromatographic determination of phthalate esters in water, surface sediments and fish species in the Ogun river catchments, Ketu, Lagos, Nigeria. *Environmental monitoring and assessment* **172(1–4)**, 561–569 (2011).
2. Blanchard M., Teil M. J., Dargnat C., Alliot F., Chevreuil M. Assessment of adult human exposure to phthalate esters in the urban centre of Paris (France). *Bulletin of environmental contamination and toxicology* **90(1)**, 91–6 (2013).
3. Bogacki J., Naumczyk J. Ex-situ physicochemical methods for the treatment of heavy metal bottom sediments. *Gaz, Woda i Technika Sanitarna* **11**, 3–42 (2009).
4. Cao X. L. Determination of phthalates and adipate in bottled water by headspace solid – phase microextraction and gas chromatography/mass spectrometry. *Journal of Chromatography A*, **1178(1–2)**, 231–238 (2008).
5. Catalan Water Agency. Historical data of pesticides and organic persistent compounds in Catalan coastal waters for the period 2007–2010. Resultats organics Maresme Ebre 2007 – 2010 (2011).
6. Chen C. W., Chen C. F., Dong C. D. Distribution of phthalate esters in sediments of Kaohsiung Harbor, Taiwan. *Soil and Sediment Contamination: An International Journal* **22(2)**, 119–131 (2013).
7. Cheng M., Zeng G., Huang D., Lai C., Xu P., Zhang C., Liu Y. Hydroxyl radicals based advanced oxidation processes (AOPs) for remediation of soils contaminated with organic compounds: a review. *Chemical Engineering Journal* **284**, 582–598 (2016).
8. Dankova R., Jarošova A., Polakova Š. The monitoring of dibutyl phthalate and di-2-ethylhexyl phthalate in Moravian agricultural soils. *Mendel Net* **35**, 736–747 (2012).
9. Fatoki O.S. Noma A. Solid phase extraction method for selective determination of phthalate esters in the Aquatic Environment. *Water Air Soil Pollut.* **140**, 85–98 (2002).

10. Fromme H., Kückler T., Otto T., Pilz K., Müller J., Wenzel A. Occurrence of phthalates and bisphenol A and F in the environment. *Water research* **36**(6), 1429–1438 (2002).
11. Gan S., Ng H. K. Modified Fenton oxidation of polycyclic aromatic hydrocarbon (PAH)-contaminated soils and the potential of bioremediation as post-treatment. *Science of the Total Environment* **419**, 240–249 (2012a).
12. Gibson R., Wang M. J., Padgett E., Beck A. J. Analysis of 4-nonylphenols, phthalates, and polychlorinated biphenyls in soils and biosolids. *Chemosphere*, **61**(9), 1336–1344 (2005).
13. GIOŚ Chief Inspectorate for Environmental Protection. Website: <http://www.gios.gov.pl/pl/stan-srodowiska/monitoring-wod>, access: 06.04.20 (2013–2016).
14. Guart A., Bono-Blay F., Borrell A., Lacorte S. Effect of bottling and storage on the migration of plastic constituents in Spanish bottled waters. *Food chemistry* **156**, 73–80 (2014).
15. Guo D. M., Wu Y. Determination of phthalic acid esters of soil in south of Xinjiang cotton fields. *Arid environmental monitoring* **25**(2), 76–79 (2011).
16. Keresztes S., Tatár E., Czégény Z., Záray G., Mihucz V. G. Study on the leaching of phthalates from polyethylene terephthalate bottles into mineral water. *Science of the total environment*, 458, 451–458 (2013).
17. Kong S., Ji Y., Liu L., Chen L., Zhao X., Wang J., ... & Sun Z. Diversities of phthalate esters in suburban agricultural soils and wasteland soil appeared with urbanization in China. *Environmental Pollution* **170**, 161–168 (2012).
18. Li R., Liang J., Gong Z., Zhang N., Duan H. Occurrence, spatial distribution, historical trend and ecological risk of phthalate esters in the Jiulong River, Southeast China. *Science of the Total Environment* **580**, 388–397 (2017).
19. Lin C., Lee C. J., Mao W. M., Nadim F. Identifying the potential sources of di-(2-ethylhexyl) phthalate contamination in the sediment of the Houjing River in southern Taiwan. *Journal of hazardous materials* **161**(1), 270–275 (2009).
20. Liu H., Cui K., Zeng F., Chen L., Cheng Y., Li, H., ... & Luan T. Occurrence and distribution of phthalate esters in riverine sediments from the Pearl River Delta region, South China. *Marine pollution bulletin* **83**(1), 358–365 (2014).
21. Long J. L., House W. A., Parker A., Rae J. E. Micro – organic compounds associated with sediments in the Humber rivers. *Science of the Total Environment* **210**, 229–253 (1998).
22. López-Roldán P., López de Alda M. J., Barceló D. Simultaneous determination of selected endocrine disruptors (pesticides, phenols and phthalates) in water by in –field solid – phase extraction (SPE) using the prototype PROFEXS followed by on – line SPE (PROSPEKT) and analysis by liquid chromatography-atmospheric pressure chemicalionisation – mass spectrometry. *Anal. Bioanal. Chem.* **378**, 599–609 (2004).
23. Magdouli S., Daghrir R., Brar S. K., Drogui P., Tyagi R. D. Di 2-ethylhexylphthalate in the aquatic and terrestrial environment: A critical review. *Journal of Environmental Management* **127**, 36–49 (2013).
24. Magnusalnervik J., Nejonsson S., Svensson B. Influence of water solubility, side – chain degradability, and side – chain structure on the degradation of phthalic acid esters under methanogenic conditions. *Environ. Sci. Technol.* **31**, 2761–2764 (1997).
25. Miłowska K. Ultrasound – mechanisms of action and application in sonodynamic therapy. *Postępy Hig Med Dosw.(online)* **61**, 338–349 (2007).
26. Minister of Supply and Services Canada Catalogue No. En 40e215/37E, ISBN 0–662–22031–5, *Canadian Environmental Protection Act*. (1994).
27. Net S., Delmont A., Sempéré R., Paluselli A., Ouddane B. Reliable quantification of phthalates in environmental matrices (air, water, sludge, sediment and soil): A review. *Science of the Total Environment* **515**, 162–180 (2015).

28. Net S., Dumoulin D., El-Osmani R., Rabodonirina S., Ouddane B. Case study of PAHs, Me-PAHs, PCBs, phthalates and pesticides contamination in the Somme River water, France. *International Journal of Environmental Research* **8**(4), 1159–1170 (2014).
29. Niu L., Xu Y., Xu C., Yun L., Liu W. Status of phthalate esters contamination in agricultural soils across China and associated health risks. *Environmental pollution* **195**, 16–23 (2014).
30. Olujimi O. O., Fatoki O. S., Odendaal J. P., Daso A. P. Chemical monitoring and temporal variation in levels of endocrine disrupting chemicals (priority phenols and phthalate esters) from selected wastewater treatment plant and freshwater systems in Republic of South Africa. *Microchemical Journal* **101**, 11–23 (2012).
31. Paluselli A., Aminot Y., Galgani F., Net S., Sempéré R. Occurrence of phthalate acid esters (PAEs) in the northwestern Mediterranean Sea and the Rhone River. *Progress in Oceanography* (2017).
32. Peijnenburg W. J., Struijs J. Occurrence of phthalate esters in the environment of the Netherlands. *Ecotoxicology and environmental safety* **63**(2), 204–215 (2006).
33. Plaza-Bolanos P., Padilla-Sanchez J.A., Garrido-Frenich A., Romero-Gonzalez R., Martinez-Vidal J.L. Evaluation of soil contamination in intensive agricultural areas by pesticides and organic pollutants: south-eastern Spain as a case study. *J. Environ. Monit.* **14**(4), 1182–1189 (2012).
34. Rhind S. M., Kyle C. E., Kerr C., Osprey M., Zhang Z. L., Duff E. I., ... & Bell J. Concentrations and geographic distribution of selected organic pollutants in Scottish surface soils. *Environmental pollution* **182**, 15–27 (2013).
35. Roslev P., Vorkamp K., Aarup J., Frederiksen K., Nielsen P. H. Degradation of phthalate esters in an activated sludge wastewater treatment plant. *Water research* **41**(5), 969–976 (2007).
36. Sanchez-Avila J., Tauler R., Lacorte S. Organic micropollutants in coastal waters from NW Mediterranean Sea: sources distribution and potential risk. *Environ. Int.* **46**, 50–62 (2012).
37. Selvaraj K. K., Sundaramoorthy G., Ravichandran P. K., Girijan G. K., Sampath S., Ramaswamy B. R. Phthalate esters in water and sediments of the Kaveri River, India: environmental levels and ecotoxicological evaluations. *Environmental geochemistry and health* **37**(1), 83–96 (2015).
38. Sha Y., Xia X., Yang Z., Huang G. H. Distribution of PAEs in the middle and lower reaches of the Yellow River, China. *Environmental monitoring and assessment* **124**(1 – 3), 277–287 (2007).
39. Škrbić B.D., Ji Y., Đurišić-Mladenović N., Zhao J. Occurrence of the phthalate esters in soil and street dust samples from the Novi Sad city area, Serbia, and the influence on the children's and adults' exposure. *Journal of Hazardous Materials* (2016).
40. Sun J., Huang J., Zhang A., Liu W., Cheng W. Occurrence of phthalate esters in sediments in Qiantang River, China and inference with urbanization and river flow regime. *Journal of Hazardous Materials* **248**, 142–149 (2013).
41. Suzuki T., Yaguchi K., Suzuki S., Suga T. Monitoring of phthalic acid monoesters in river water by solid-phase extraction and GC-MS determination. *Environmental science & technology* **35**(18), 3757–3763 (2001).
42. Tan G. H. Residue levels of phthalate esters in water and sediment samples from the Klang River basin. *Bulletin of Environmental Contamination and Toxicology* **54**(2), 171–176 (1995).
43. Tang C. Y., Li A. Q., Guan Y. B., Yan, L. I., Cheng X. M., Ping L. I., ... & Cui L. X. Influence of polluted SY River on child growth and sex hormones. *Biomedical and Environmental Sciences* **25**(3), 291–296 (2012).
44. Tecnon Orbichem Chemical Business Focus e a Monthly Roundup and Analysis of the Key Factors Shaping World Chemical Markets **314** (2007).



45. Tran B. C., Blanchard M., Alliot F., Chevreuil M. Fate of phthalates and BPA in agricultural and non-agricultural soils of the Paris area (France). *Environmental Science and Pollution Research* **22**(14), 11118–11126 (2015).
46. Vethaak A. D., Lahr J., Schrap S. M., Belfroid A. C., Rijs G. B. J., Gerritsen A., de Boer J., Bulder A. S., Grinwis G. C. M., Kuiper R. V., Legler J., Murk T. A. J., Peijnenburg W., Verhaar H. J. M., de Voogt P. An integrated assessment of estrogenic contamination and biological effects in the aquatic environment of The Netherlands. *Chemosphere* **59**, 511–524 (2005).
47. Vikelsøe J., Thomsen M., Carlsen L. (2002). Phthalates and nonylphenols in profiles of differently dressed soils. *Science of the Total Environment* **296**(1–3), 105–116.
48. Wang F., Sha Y. J., Xia X. H., Liu H. Distribution characteristics of phthalic acid esters in the Wuhan section of the Yangtze River. *Huan jing ke xue= Huanjing kexue* **29**(5), 1163–1169 (2008a).
49. Wang F., Xia X., Sha Y. Distribution of phthalic acid esters in Wuhan section of the Yangtze River, China. *Journal of Hazardous Materials* **154**(1–3), 317–324 (2008b).
50. Wang G., Kawamura K., Lee S., Ho K., Cao J. Molecular, seasonal, and spatial distributions of organic aerosols from fourteen Chinese cities. *Environmental Science & Technology* **40**(15), 4619–4625 (2006).
51. Wang H., Liang H., Gao D. W. Occurrence and risk assessment of phthalate esters (PAEs) in agricultural soils of the Sanjiang Plain, northeast China. *Environmental Science and Pollution Research* **24**(24), 19723–19732 (2017).
52. Wang J., Chen G., Christie P., Zhang M., Luo Y., Teng Y. Occurrence and risk assessment of phthalate esters (PAEs) in vegetables and soils of suburban plastic film greenhouses. *Science of the Total Environment* **523**, 129–137 (2015).
53. Yap C. L., Gan S., Ng H. K. Fenton based remediation of polycyclic aromatic hydrocarbons-contaminated soils. *Chemosphere* **83**(11), 1414–1430 (2011).
54. Zaki G., Shoeib T. Concentrations of several phthalates contaminants in Egyptian bottled water: Effects of storage conditions and estimate of human exposure. *Science of The Total Environment* **618**, 142–150 (2018).
55. Zeng F., Cui K., Xie Z., Liu M., Li Y., Lin Y., ... & Li F. Occurrence of phthalate esters in water and sediment of urban lakes in a subtropical city, Guangzhou, South China. *Environment International* **34**(3), 372–380 (2008).
56. Zeng F., Cui K., Xie Z., Wu L., Liu M., Sun G., ... & Zeng Z. Phthalate esters (PAEs): emerging organic contaminants in agricultural soils in peri-urban areas around Guangzhou, China. *Environmental Pollution* **156**(2), 425–434 (2008b).
57. Zeng F., Cui K., Xie Z., Wu L., Luo D., Chen L., ... & Sun G. Distribution of phthalate esters in urban soils of subtropical city, Guangzhou, China. *Journal of Hazardous Materials* **164**(2–3), 1171–1178.
58. Zhang Y., Liang Q., Gao R., Hou H., Tan W., He X., ... & Wang X. (2015). Contamination of phthalate esters (PAEs) in typical wastewater-irrigated agricultural soils in Hebei, North China. *PloS one* **10**(9), 0137998 (2009).
59. Zhang Z. M., Zhang H. H., Zhang J., Wang Q. W., Yang G. P. Occurrence, distribution, and ecological risks of phthalate esters in the seawater and sediment of Changjiang River Estuary and its adjacent area. *Science of The Total Environment* **619**, 93–102 (2018).
60. Zhao G., Sheng Y., Wang C., Yang J., Wang Q., Chen L. In situ microbial remediation of crude oil-soaked marine sediments using zeolite carrier with a polymer coating. *Marine pollution bulletin* **129**(1), 172–178 (2018).
